# Supplementary material
Source: PubMed Central journal article supplement (PMC5827954)
Supplement: NIHMS944048-supplement-Suppl_Figures.pdf [file NIHMS944048-supplement-Suppl_Figures.pdf]

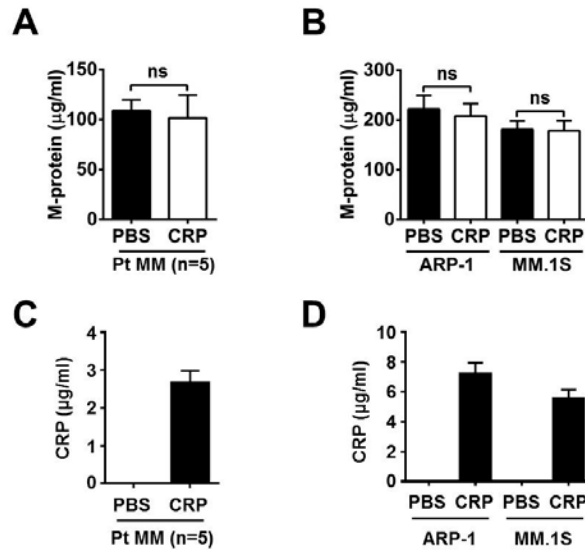

**Figure S1. Injection of CRP does not affect tumor growth in vivo.** (A to D) Serum levels of M-protein in (A, C) SCID-hu mice bearing primary myeloma cells isolated from myeloma patients (n = 5) and (B, D) SCID mice (n = 10 per group) bearing myeloma after injection with ARP-1 or MM.1S and treated with CRP (20 μg/mouse; twice a week for 8 weeks) or PBS at 8 weeks after tumor injection. M-protein or CRP levels were measured by ELISA. Data from three independent experiments are shown. ns: not significant, by student's t test.

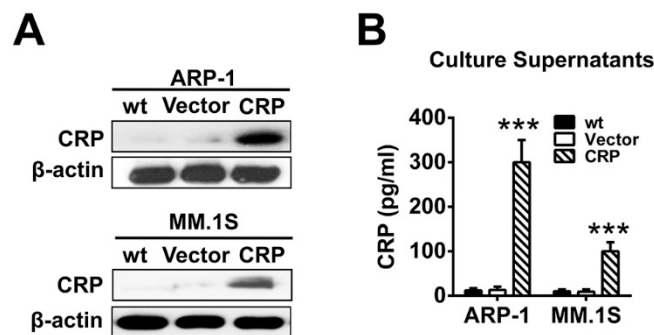

**Figure S2. Generation of CRP-expressing myeloma cells.** (A) Western blot analysis shows expression of CRP proteins in ARP-1 (upper panels) and MM.1S (lower panel) cells transfected with lentivirus carrying human *CRP* cDNA (CRP). Wild type (wt) cells and cells transfected with lentivirus vector control (Vector) served as controls. β-actin served as a protein loading control. (B) ELISA shows the levels of secreted CRP in the culture supernatants of CRP-expressing ARP-1 and MM.1S cells, compared with controls. Representative results or data from three independent experiments are shown. \*\*\* $P < 0.001$  by student's t test.

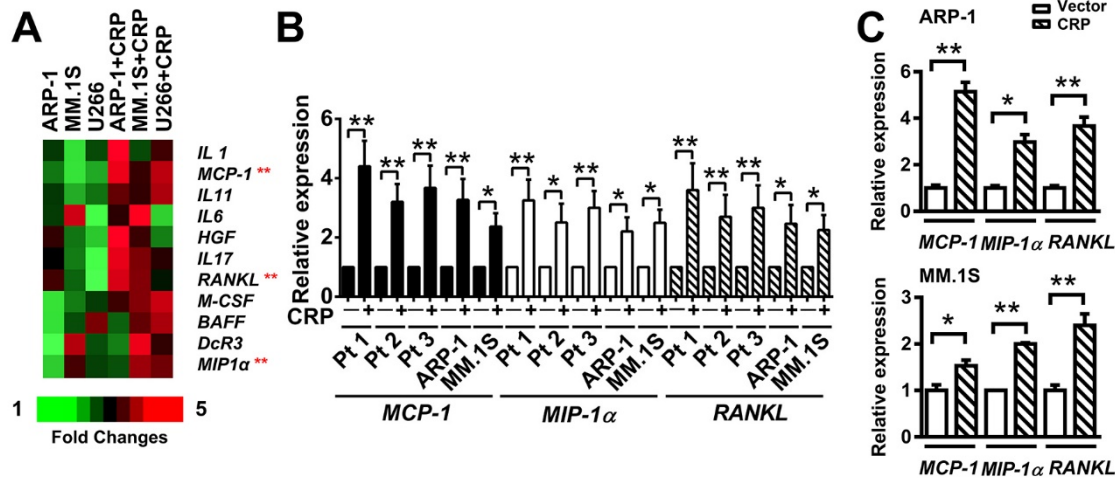

**Figure S3. CRP upregulates myeloma cell production of cytokines important for OC activation.** (A) Expression pattern of OC differentiation-associated cytokines in the medium of ARP-1, MM.1S or U266 cells cultured in the presence or absence of CRP (5 μg/mL). (B) Real-time PCR shows the mRNA level of three cytokines (*MCP-1*, *MIP-1α*, and *RANKL*) in cultured primary myeloma cells from 3 of 5 patients (Pt1-Pt3) and myeloma cell lines (ARP-1, MM.1S, CAG, U266) in the presence or absence of CRP (5 μg/mL). (C) Real-time PCR shows the mRNA level of three cytokines (*MCP-1*, *MIP-1α*, and *RANKL*) in CRP-expressing ARP-1 and MM.1S cells in comparison with control myeloma cells. \**P* < 0.05, \*\**P* < 0.01 by student's *t* test. Data from five independent experiments are shown.

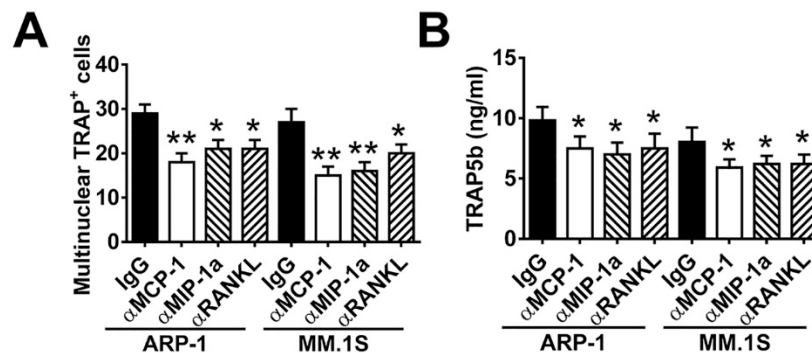

**Figure S4. Antibodies specific for OC-activating cytokines inhibit CRP-induced OC activation.** (A) Number of multinuclear TRAP<sup>+</sup> cells and (B) amount of secreted TRAP5b in culture medium of OC precursors cocultured with ARP-1 or MM.1S cells without RANKL but with CRP (5 μg/mL) and blocking antibodies (1 μg/mL) against MCP-1, MIP-1α, or RANKL, as compared with those in coculture with addition of control (IgG). \**P* < 0.05, \*\**P* < 0.01 by student's *t* test. Data from five independent experiments are shown.

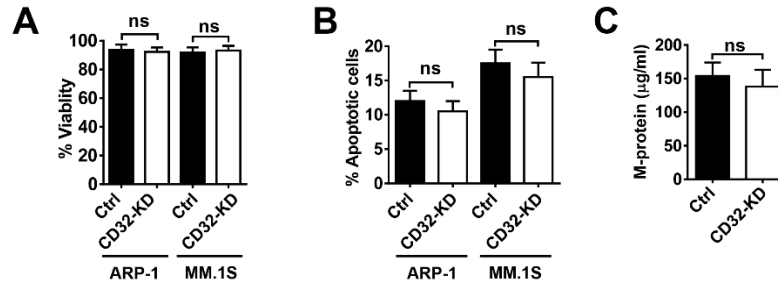

**Figure S5. Knockdown or overexpression of CD32 does not affect myeloma cell proliferation or survival.** (A) Viability of cultured non-targeted shRNA (Ctrl) or CD32-knockdown (CD32-KD) ARP-1 or MM.1S cells. (B) Percentages of apoptotic control or CD32-KD ARP-1 or MM.1S cells in a 48-hour culture. Results represent average values from five independent experiments. (C) Serum M-protein (secreted by myeloma cells) of SCID mice (n = 10 per group) injected with control or CD32-KD ARP-1 cells. Results represent average values from three independent experiments. Results represent average values from three independent experiments.

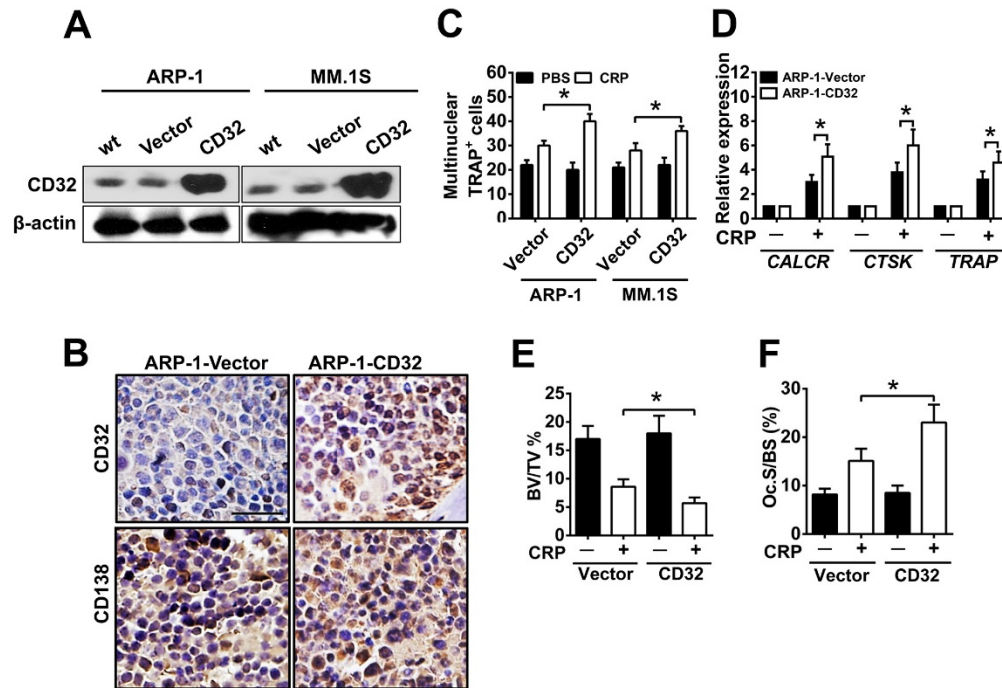

**Figure S6. Overexpression of CD32 in myeloma cells enhances CRP-induced OC differentiation.** (A) Expression of CD32 proteins in cultured wild-type (wt), vector control (vector), and CD32-overexpressing (CD32) ARP-1 or MM.1S cells. β-actin served as the protein loading control. (B) Expression of CD32 and CD138 in bone sections of SCID mouse femurs (n = 10 per group) injected with vector or CD32 ARP-1 cells. Scale bar, 50 μM. (C) Numbers of

multinuclear TRAP<sup>+</sup> OCs generated from OC precursors cocultured with CD32 ARP-1 or MM.1S cells in the presence of CRP (5 µg/mL), compared with those of cells generated from precursors cocultured with vector myeloma cells. **(D)** Real-time PCR analysis shows an enhanced OC gene expression in OCs cocultured with CD32 ARP-1 cells in the presence of CRP (5 µg/mL), compared with cells cocultured with vector-ARP-1 cells. (Co)cultures with addition of PBS served as controls. **(E-F)** Histomorphometric analysis shows **(E)** decreased bone volume (BV/TV) and **(F)** increased numbers of OCs on the bone surface (Oc. S/BS) in the bone sections of distal femurs of SCID mice (n = 10 per group) injected CD32 ARP-1 cells, compared with those of mice injected with control (vector) ARP-1 cells. Mice receiving no CRP injection served as control. \**P* < 0.05 by student's t test. Representative results of three independent experiments are shown.

**Table S1. Primers used for real-time PCR.**

| Gene          | Direction | Sequence              |
|---------------|-----------|-----------------------|
| <i>GAPDH</i>  | Forward   | CTGGGCTACACTGAGCACC   |
| <i>CTSK</i>   | Forward   | CCATATGTGGGACAGGAAGA  |
|               | Reverse   | CCTCTTCAGGGCTTTCTCAT  |
| <i>CALCR</i>  | Forward   | GGGAATCCAGTTTGTCGTCT  |
|               | Reverse   | ACAAAGAAGCCCTGGAAATG  |
| <i>TRAP</i>   | Forward   | AGATCCTGGGTGCAGACTTC  |
|               | Reverse   | AAGGGAGCGGTCAGAGAATA  |
| <i>MCP-1</i>  | Forward   | CAGCCAGATGCAATCAATGCC |
|               | Reverse   | TGGAATCCTGAACCCACTTCT |
| <i>MIP-1α</i> | Forward   | CTGCTCAGAATCATGCAGGT  |
|               | Reverse   | ATGCAGAGAACTGGTTGCAG  |
| <i>RANKL</i>  | Forward   | ATCGTTGGATCACAGCACAT  |
|               | Reverse   | TTATGGGAACCAGATGGGAT  |
